# Supplementary material
Source: Royal Society of Chemistry journal article supplement (doi:10.1039/d6ma00255b)
Supplement: d6ma00255b1.pdf [file d6ma00255b1.pdf]

## Supporting Information

### **Engineering Oxygen-Vacancy-Rich S-Scheme CeSnO<sub>3</sub>/Bi<sub>2</sub>S<sub>3</sub> Perovskite-Based Heterojunction with Dynamic Ce<sup>3+</sup>/Ce<sup>4+</sup> Redox Recycling: Efficient Photoactivation of Peroxymonosulfate towards Lindane Degradation, Antimicrobial Activity and Sustainable H<sub>2</sub> Production**

Kaiser Khan<sup>a</sup>, Ikhtiar Gul<sup>a</sup>, Changseok Han<sup>b,c</sup>, Wang Jinlong<sup>d</sup>, Mallikarjuna N Nadagouda<sup>e</sup>, Saima Noorin<sup>f</sup>, Juan Zhang<sup>g</sup>, Murtaza Sayed<sup>a,\*</sup>

<sup>a</sup>*Radiation and Environmental Chemistry Lab, National Centre of Excellence in Physical Chemistry, University of Peshawar, Peshawar 25120, Pakistan.*

<sup>b</sup>*Department of Environmental Engineering, College of Engineering, INHA University, Incheon, Korea.*

<sup>c</sup>*Program in Environmental and Polymer Engineering, Graduate School of INHA University, Incheon, Korea.*

<sup>d</sup>*College of Chemistry, Central China Normal University, Wuhan 430079, China.*

<sup>e</sup>*Department of Mechanical and Materials Engineering, Wright State University, Dayton, OH 45435, United States.*

<sup>f</sup>*Department of Chemistry, University of Agriculture Faisalabad, Pakistan.*

<sup>g</sup>*Center for Molecular Recognition and Biosensing, Joint International Research Laboratory of Biomaterials and Biotechnology in Organ Repair, Ministry of Education, Shanghai Engineering Research Center of Organ Repair, Shanghai Key Laboratory of Bio-Energy Crops, School of Life Sciences, Shanghai University, Shanghai, 200444, PR China.*

\*Corresponding author's e-mail address.

murtazasayed@uop.edu.pk (M.Sayed)

## **Text S1**

### **2.6. Photocatalytic degradation of LN under simulated solar irradiations in aqueous media**

#### **SPME extraction for LN**

Solid phase micro-extraction (SPME) technique was used to collect the sample (LN) from aqueous media. Lindane was extracted by exposing the SPME fiber in glass vials for 1 min, followed by thermal desorption in the GC inlet for 1. After each run, the fiber was rinsed with Milli-Q water using the dip-injection method to eliminate residual contaminants <sup>1</sup>.

#### **Quantitative determination of LN using GC- $\mu$ ECD**

Gas chromatography coupled with a micro-cell electron capture detector (GC- $\mu$ ECD) was employed for the detection and quantification of lindane in aqueous samples. This analytical technique is highly sensitive toward halogenated organic compounds, enabling trace-level analysis in environmental and biological matrices. GC- $\mu$ ECD was selected due to its superior selectivity and sensitivity toward organochlorine pesticides compared to other conventional detectors, making it particularly suitable for lindane analysis <sup>2</sup>. The quantification of lindane was carried out using an Agilent 6890N GC system equipped with a  $\mu$ ECD operated in splitless mode. Separation was achieved using an HP-5 capillary column (30 m  $\times$  0.25 mm I.D., 0.25  $\mu$ m film thickness). The oven temperature program was set as follows: initial temperature of 50  $^{\circ}$ C (held for 2 min), ramped to 150  $^{\circ}$ C at 10  $^{\circ}$ C min<sup>-1</sup> (held for 3 min), and further increased to 250  $^{\circ}$ C at 20  $^{\circ}$ C min<sup>-1</sup> (held for 5 min). The injector and detector temperatures were maintained at 220  $^{\circ}$ C and 350  $^{\circ}$ C, respectively. High-purity nitrogen was used as the carrier gas at a flow rate of 2.7 mL min<sup>-1</sup>.

## **Text S2**

### **2.7. Assessment of acute and chronic toxicity**

To evaluate the ecotoxicological impact of the photocatalytic degradation process, the Ecological Structure–Activity Relationship (ECOSAR) program, which is based on structure–activity

relationships (SARs), was employed. This assessment aimed to determine whether the proposed photocatalytic treatment of lindane (LN) qualifies as an environmentally benign and safe approach. The ecotoxicity of the parent contaminants and their respective degradation products (DPs) was evaluated by predicting both acute and chronic toxicities toward representative aquatic organisms including green algae, *Daphnia* and fish. ECOSAR is particularly applicable in this context, because both lindane (LN) and its DPs possess relatively low molecular weights (generally  $<1000 \text{ g mol}^{-1}$ ), which fall within the operational domain of the model. Key toxicological endpoints, including the chronic value (ChV), half maximal effective concentration ( $EC_{50}$ ), and lethal concentration ( $LC_{50}$ ), were used to assess the potential toxicity of these compounds. Specifically,  $EC_{50}$  refers to the concentration of a compound that inhibits 50% of green algae growth after 96 hrs of exposure, while  $LC_{50}$  denotes the concentration that leads to 50% mortality in *Daphnia* and fish following 48 and 96 hrs of exposure, respectively. These parameters collectively provide insight into the potential ecological risks associated with the degradation products formed during the photocatalytic treatment process<sup>3,4</sup>.

### **Text S3**

## **2.8. Assessment of antimicrobial properties**

Using the agar well diffusion method under visible light irradiation, the antibacterial activity of the as-synthesized  $CeSnO_3$ ,  $Bi_2S_3$  and  $CeSnO_3/Bi_2S_3$  was assessed against the Gram-negative bacterium *Escherichia coli* (*E. coli*) and the fungus *Candida albicans* (*C. albicans*).

### **Microbial Strains and Culture Preparation**

Nutrient agar (NA) and Sabouraud Dextrose Agar (SDA) were used to obtain and maintain pure cultures of *E. coli* and *C. albicans*, respectively. Both strains were cultivated for the duration of the experiment at  $37^\circ\text{C}$  and  $30^\circ\text{C}$ , respectively, in nutritional broth for *E. coli* and Sabouraud dextrose broth for *C. albicans*. The turbidity of the microbiological suspensions was

brought down to 0.5 McFarland standard, which is roughly  $1.5 \times 10^8$  CFU/mL for bacteria and  $10^6$  CFU/mL for yeast.

### **Preparation of Agar Plates and Inoculation**

Molten nutritional agar (for *E. coli*) and SDA (for *C. albicans*) were added to sterile Petri plates, which were then left to solidify. To construct a confluent microbial lawn, 100  $\mu$ L of the prepared microbial solution was evenly applied to the agar surface using a sterile cotton swab after it had solidified. The plates were left undisturbed for 10–15 min to allow absorption.

### **Well Formation and Sample Loading**

A sterile cork borer was used to punch wells into the agar that were 6 mm in diameter. To assure homogeneity, the synthesized  $\text{CeSnO}_3$ ,  $\text{Bi}_2\text{S}_3$  CB30 samples were ultrasonically dissolved in sterile distilled water at a concentration of 5 mg/mL for ten min. Each dispersion was then gently pipetted into its corresponding well, containing 100  $\mu$ L of dispersion.

### **Visible Light Irradiation**

Following sample loading, a white LED lamp with a wavelength range of 400–700 nm was placed at a fixed distance of 15 cm to expose the infected plates to visible light. At room temperature, the irradiation was carried out for 30 min. Care was taken to ensure uniform exposure of all plates.

### **Incubation and Measurement**

The plates were incubated for 24 hrs at 37°C for *E. coli* and 24-48 hrs at 30°C for *Candida albicans* after light treatment. Following incubation, a digital caliper was used to measure the diameter of the zones of inhibition surrounding each well in mm.

**Table S1** Chemical composition of TW, SW and IW

| Water Type | HCO <sub>3</sub> <sup>-</sup> (mg L <sup>-1</sup> ) | CO <sub>3</sub> <sup>2-</sup> (mg L <sup>-1</sup> ) | Ca <sup>2+</sup> (mg L <sup>-1</sup> ) | Fe <sup>2+</sup> (mg L <sup>-1</sup> ) | NO <sub>2</sub> <sup>-</sup> (mg L <sup>-1</sup> ) | SO <sub>4</sub> <sup>2-</sup> (mg L <sup>-1</sup> ) | Cl <sup>-</sup> (mg L <sup>-1</sup> ) | Mg <sup>2+</sup> (mg L <sup>-1</sup> ) | HA (mg L <sup>-1</sup> ) |
|------------|-----------------------------------------------------|-----------------------------------------------------|----------------------------------------|----------------------------------------|----------------------------------------------------|-----------------------------------------------------|---------------------------------------|----------------------------------------|--------------------------|
| TW         | 0.545                                               | 0.677                                               | —                                      | 0.236                                  | 0.435                                              | 0.944                                               | 0.165                                 | —                                      | —                        |
| SW         | 1.173                                               | 1.073                                               | —                                      | 1.049                                  | 1.087                                              | 1.188                                               | 1.101                                 | —                                      | 0.226                    |
| IW         | 16.83                                               | —                                                   | 2.50                                   | 0.22                                   | Nil                                                | 26.43                                               | 12.95                                 | 3.84                                   | —                        |

**Table S2** Comparison of catalytic systems reported in literature for lindane degradation under different experimental conditions.

| Catalyst system                                                      | Oxidant/Process                        | [Lindane] <sub>0</sub>       | [Catalyst] <sub>0</sub> | Reaction Time  | % Degradation | Reference        |
|----------------------------------------------------------------------|----------------------------------------|------------------------------|-------------------------|----------------|---------------|------------------|
| S-TiO <sub>2</sub> /PMS                                              | PMS (0.2 mM), visible light            | 1.0 μM                       | 0.23 g L <sup>-1</sup>  | 6 h            | 99.9%         | 5                |
| Solar/TiO <sub>2</sub>                                               | Photocatalysis (no oxidant)            | 2.6 μg L <sup>-1</sup>       | 0.5 g L <sup>-1</sup>   | 10 h           | 25.77 %       | 1                |
| UV/PS                                                                | Sulfate radical oxidation              | 3.43 μM                      | 100 μM                  | 2 h            | 93.2%         | 6                |
| SSLA-TiO <sub>2</sub> /PS                                            | Photocatalysis with persulfate         | ~1 mg L <sup>-1</sup>        | 0.5 g L <sup>-1</sup>   | 6 h            | ~89 %         | 7                |
| N-doped TiO <sub>2</sub>                                             | UV/visible photocatalysis              | 0.1 mg L <sup>-1</sup>       | 1 g L <sup>-1</sup>     | 7 h            | ~95 %         | 8                |
| Persulfate/<br>Ferrioxalate/<br>Solar process                        | Simulated solar light                  | 5 mg L <sup>-1</sup>         | 0.12 mM                 | 2 h            | ~95 %         | 9                |
| <b>CeSnO<sub>3</sub>/Bi<sub>2</sub>S<sub>3</sub><br/>(This work)</b> | <b>PMS (1.5 mM),<br/>visible light</b> | <b>600 μg L<sup>-1</sup></b> | <b>15 mg</b>            | <b>100 min</b> | <b>93.21%</b> | <b>This work</b> |

**Table S3** Eco-toxicity assessment of LN, MV and their DPs towards aquatic organisms (mg L<sup>-1 a</sup>).

| Compound/DPs | Acute toxicity          |                            |                                | Chronic toxicity     |         |             |
|--------------|-------------------------|----------------------------|--------------------------------|----------------------|---------|-------------|
|              | LC <sub>50</sub>        |                            | EC <sub>50</sub>               | ChV                  |         |             |
|              | Fish<br>(Duration 96 h) | Daphnia<br>(Duration 48 h) | Green Algae<br>(Duration 96 h) | Fish                 | Daphnia | Green Algae |
| LN           | 2.24                    | 1.57                       | 2.76                           | 0.28                 | 0.27    | 1.15        |
| DP1          | 0.52                    | 0.48                       | 1.31                           | 0.05                 | 0.04    | 0.76        |
| DP2          | 1.26                    | 1.14                       | 2.68                           | 0.17                 | 0.06    | 1.25        |
| DP3          | 0.08                    | 0.06                       | 0.211                          | 0.012                | 0.017   | 0.12        |
| DP4          | 8.52                    | 5.45                       | 6.62                           | 0.95                 | 0.73    | 2.26        |
| DP5          | 2.72                    | 2.27                       | 0.25                           | 0.31                 | 0.32    | 0.75        |
| DP6          | 27.6                    | 325                        | 5.87                           | 17.8                 | 129     | 0.67        |
| DP7          | 3.16×10 <sup>3</sup>    | 3.80×10 <sup>3</sup>       | 1.53×10 <sup>3</sup>           | 2.12×10 <sup>3</sup> | 388     | 221         |
| DP8          | 718                     | 282                        | 53.3                           | 63.1                 | 24.3    | 215         |
| DP9          | 4.85×10 <sup>4</sup>    | 2.24×10 <sup>3</sup>       | 711                            | 372                  | 123     | 118         |

<sup>a</sup>Acute toxicities based on the European Union criteria (described in Annex VI of Directive 67/548/EEC); Not harmful, Harmful, Toxic, and very toxic. While chronic toxicities evaluation based on the Chinese hazard evaluation criteria for new chemical substances (HJ/T154–2004); Not harmful, Harmful, Toxic, and very toxic.

**Table S4** Antimicrobial activities analysis CeSnO<sub>3</sub>, Bi<sub>2</sub>S<sub>3</sub> and CB30 against *E. coli* and *C. albicans* using well diffusion method.

| Sample                         | <i>E. coli</i><br>ZOI (mm) | Average ZOI (mm) | <i>C. albicans</i><br>ZOI (mm) | Average ZOI (mm) |
|--------------------------------|----------------------------|------------------|--------------------------------|------------------|
| CeSnO <sub>3</sub>             | 18 & 15                    | 16.5             | 16 & 19                        | 17.5             |
| Bi <sub>2</sub> S <sub>3</sub> | 17 & 20                    | 18.5             | 16 & 21                        | 18.5             |
| CB30                           | 20 & 23                    | 21.5             | 19 & 21                        | 20               |

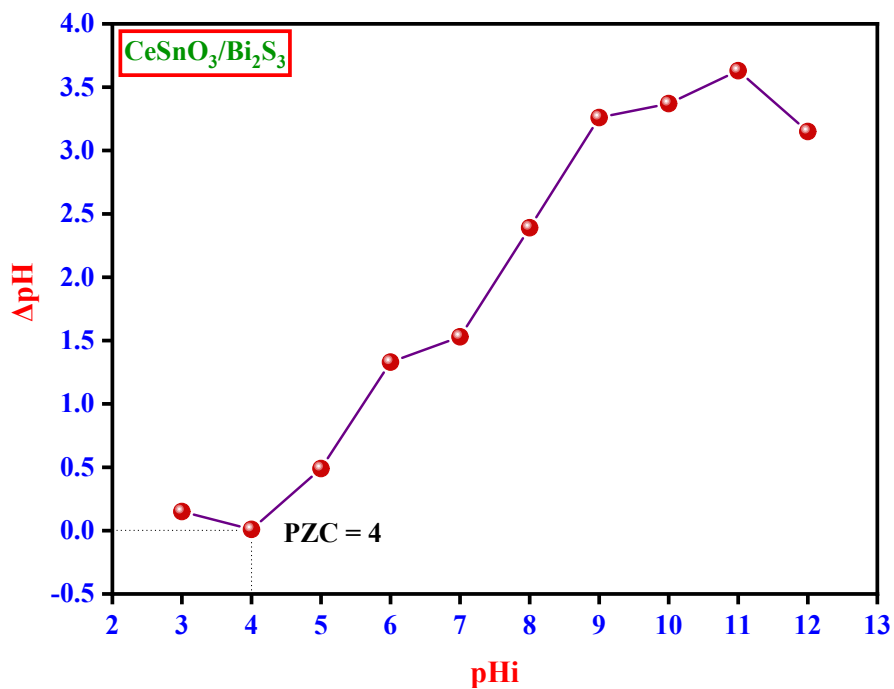

**Fig. S1.** PZC analysis of as-synthesized CB30 using salt addition method. Experimental conditions: [CB30] = 15 mg; [NaNO<sub>3</sub>] = 0.1 M; [HNO<sub>3</sub>] = 0.1 M; [NaOH] = 0.1 M.

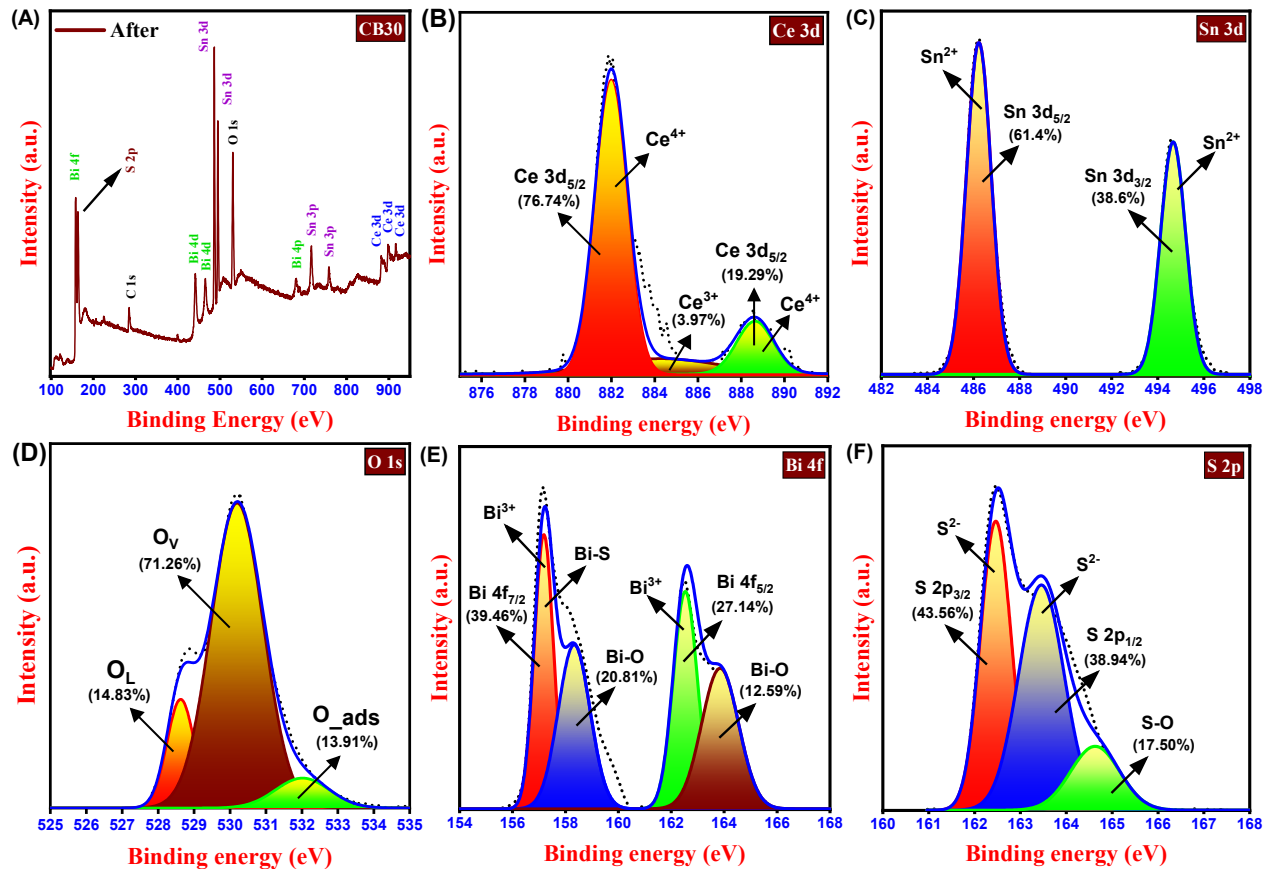

**Fig. S2.** XPS analysis of as-synthesized CB30 after illumination: Full length spectra (A), high resolution spectra of Ce (B), Sn (C), O (D), Bi (E) and S (F).

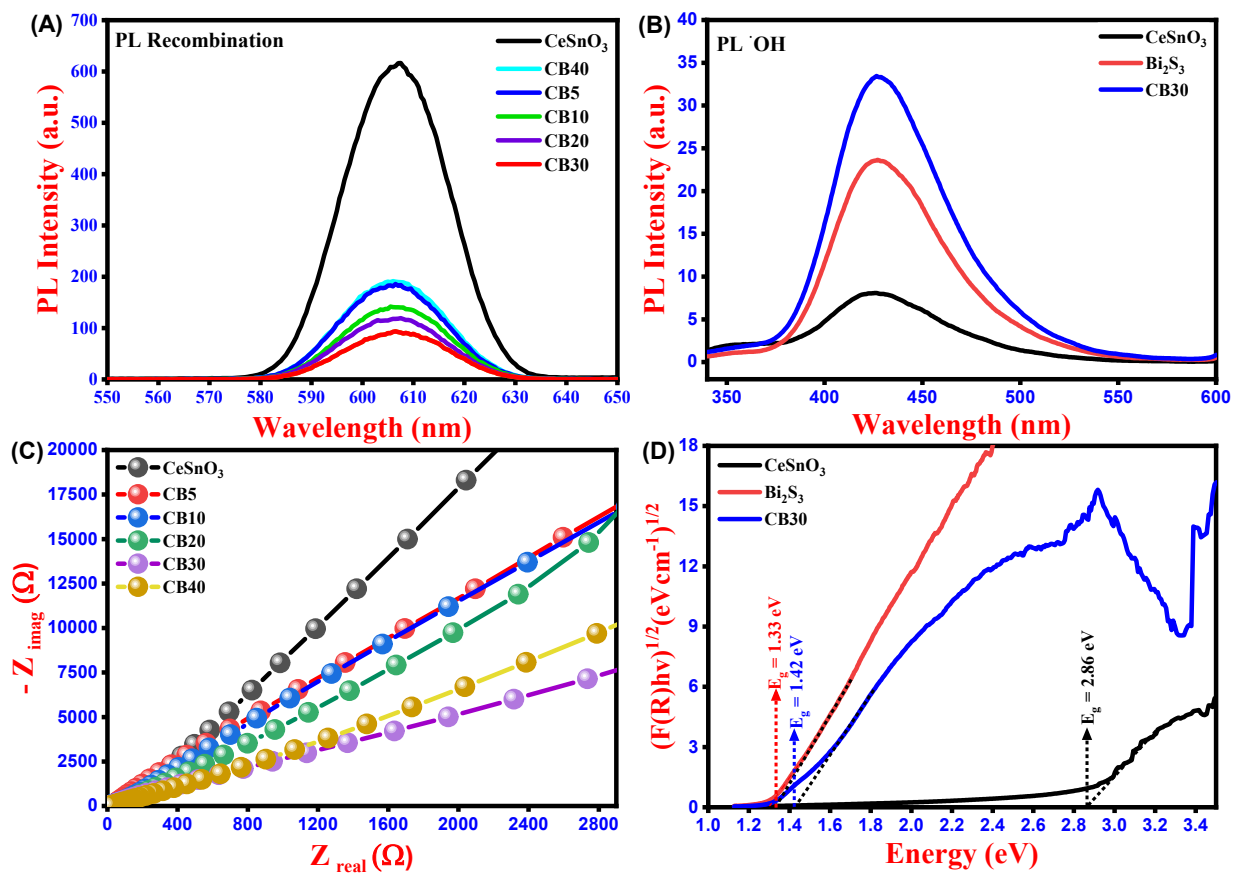

**Fig. S3.** PL recombination (A), PL for  $\cdot$ OH formation (B) EIS Nyquist plots (C) and UV-vis DRS (D) of as-synthesized materials.

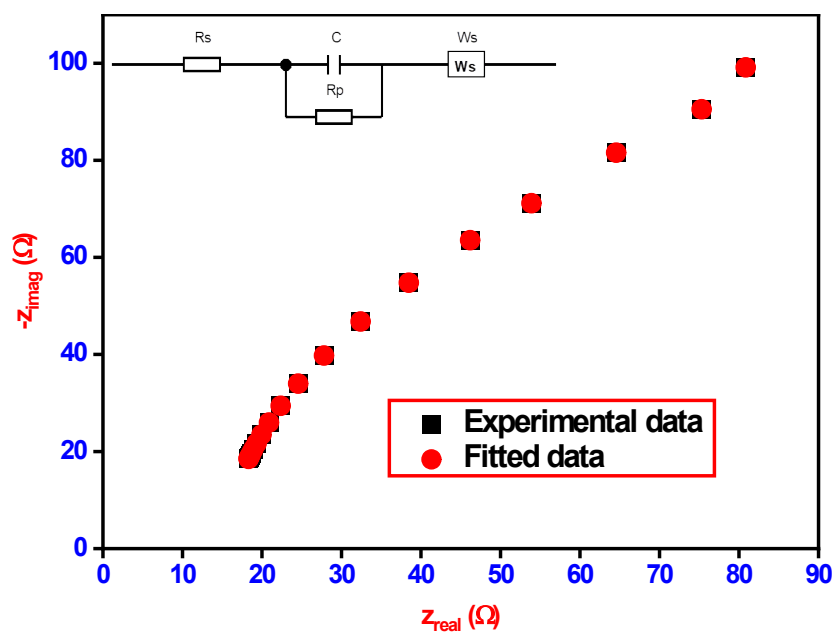

**Fig. S4.** Nyquist impedance plot of CB30 with equivalent circuit inset ( $R_s-(C\parallel R_p)-W_s$  model), showing experimental EIS data and the corresponding fitted response.

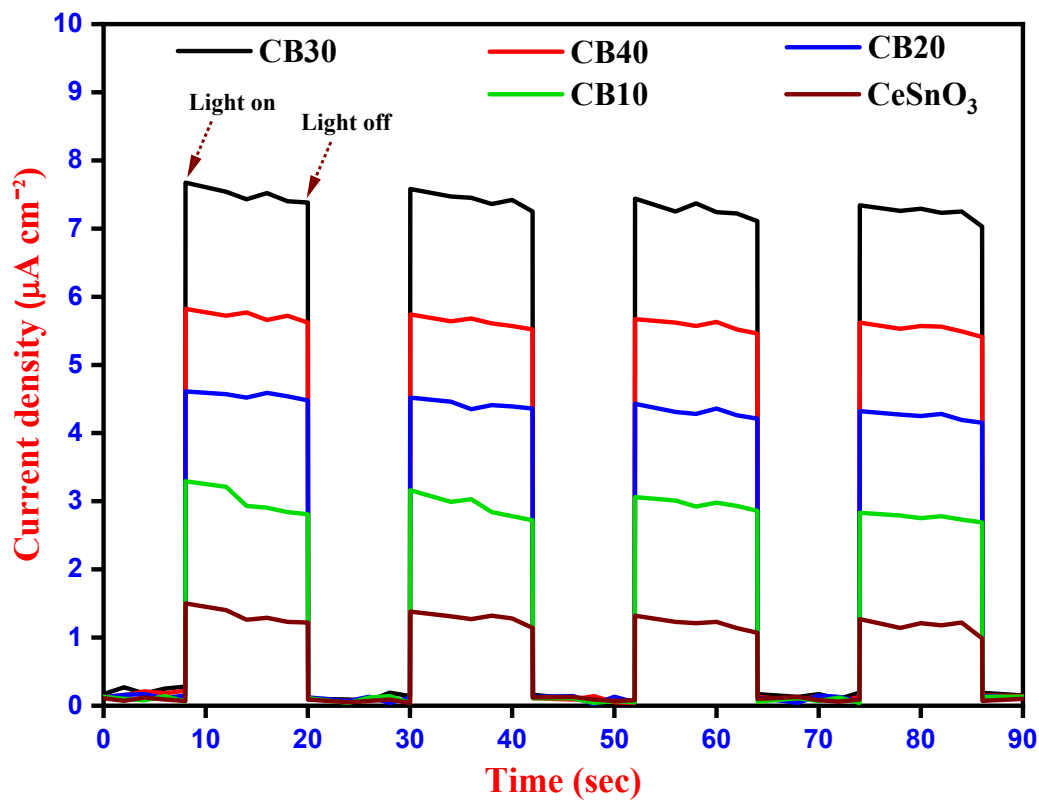

**Fig. S5** Photocurrent response of as-synthesized CeSnO<sub>3</sub>, CB10, CB20, CB30 and CB40 heterojunctions.

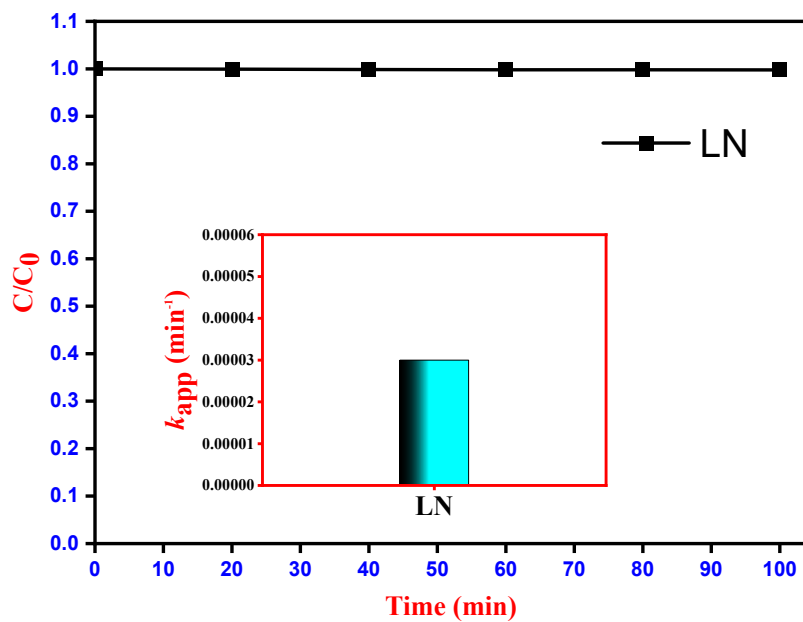

Fig. S6. Photolysis of LN under simulated solar light illumination for 100 min in aqueous media.

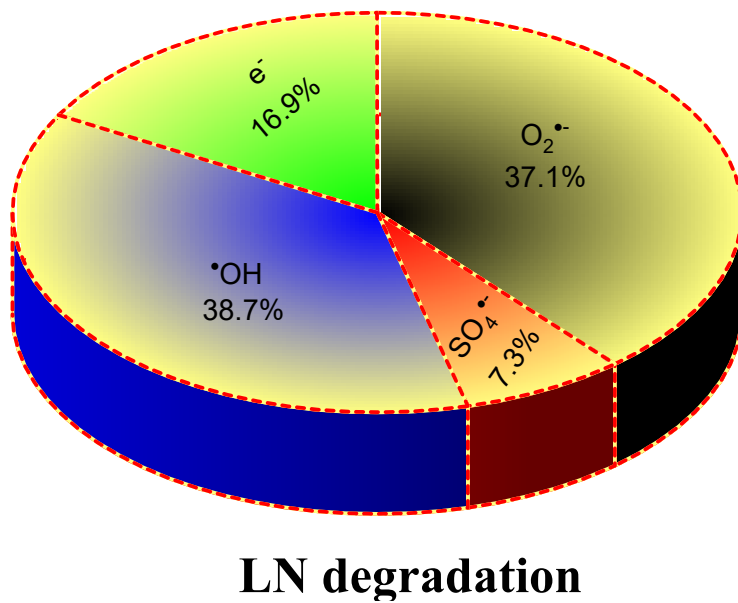

Fig. S7. Percent contribution reactive species in the photocatalytic degradation of LN.

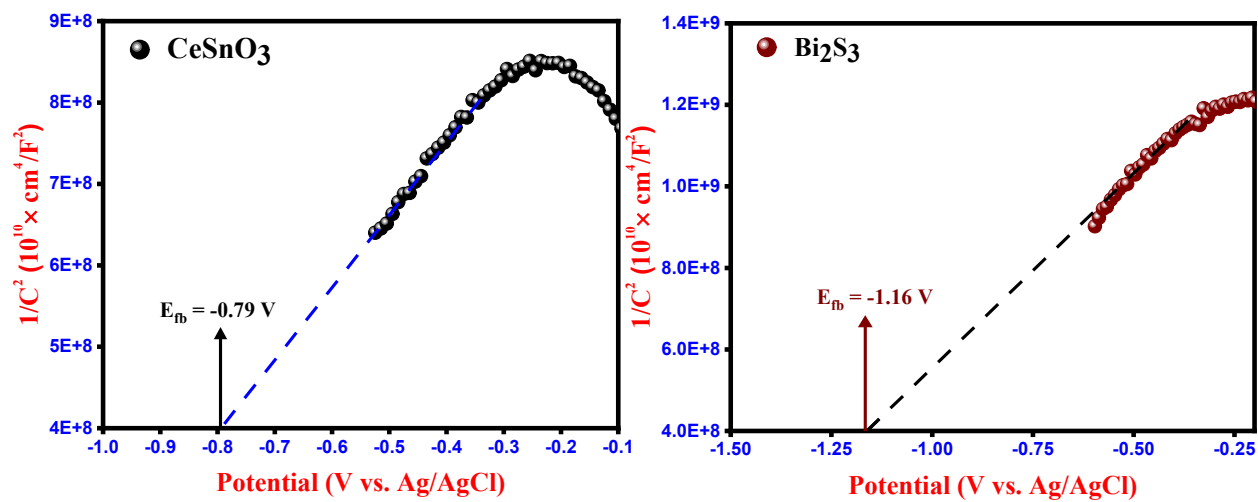

Fig. S8. Mott-Schottky plots of  $\text{CeSnO}_3$  (A) and  $\text{Bi}_2\text{S}_3$  (B).

## References

1. S. Khan, J. A. Khan, N. S. Shah, M. Sayed, M. Ateeq, S. Ansar, G. Boczkaj and U. J. R. a. Farooq, *RSC Advances*, 2023, 13, 20430-20442.
2. O. Komolafe, B. Bowler, J. Dolfing, W. Mrozik and R. J. J. A. M. Davenport, *Analytical Methods*, 2019, 11, 3474-3482.
3. F. Ullah, Z. U. H. Khan, S. Sabahat, M. Aftab, J. Sun, N. S. Shah, A. Rahim, M. M. Abdullah and M. J. C. E. S. Imran, *Chemical Engineering Science*, 2025, 302, 120844.
4. I. Gul, M. Sayed, F. Rehman, W. Jinlong, P. Fu, Y. Zhang, M. N. J. A. C. B. E. Nadagouda, *Applied Catalysis B: Environment and Energy*, 2024, 359, 124493.
5. S. Khan, C. Han, H. M. Khan, D. L. Boccelli, M. N. Nadagouda and D. D. J. M. C. Dionysiou, *Molecular Catalysis*, 2017, 428, 9-16.
6. S. Khan, X. He, J. A. Khan, H. M. Khan, D. L. Boccelli and D. D. J. C. e. j. Dionysiou, *Chemical Engineering Journal*, 2017, 318, 135-142.
7. S. Khan, C. Han, M. Sayed, M. Sohail, S. Jan, S. Sultana, H. M. Khan and D. D. J. C. Dionysiou, *Catalysts*, 2019, 9, 425.
8. J. Senthilnathan and L. J. C. e. j. Philip, *Chemical Engineering Journal*, 2010, 161, 83-92.
9. L. O. Conte, G. Legnettino, D. Lorenzo, S. Cotillas, M. Prisciandaro and A. J. A. C. B. E. Santos, *Applied Catalysis B: Environmental*, 2023, 324, 122288.
